# Supplementary material for: Symmetric arrangement of mitochondria:plasma membrane contacts between adjacent photoreceptor cells regulated by Opa1
Source: bioRxiv or medRxiv preprint supplement (doi:10.1101/635094), 2019-05-21

Supplementary Figure 1

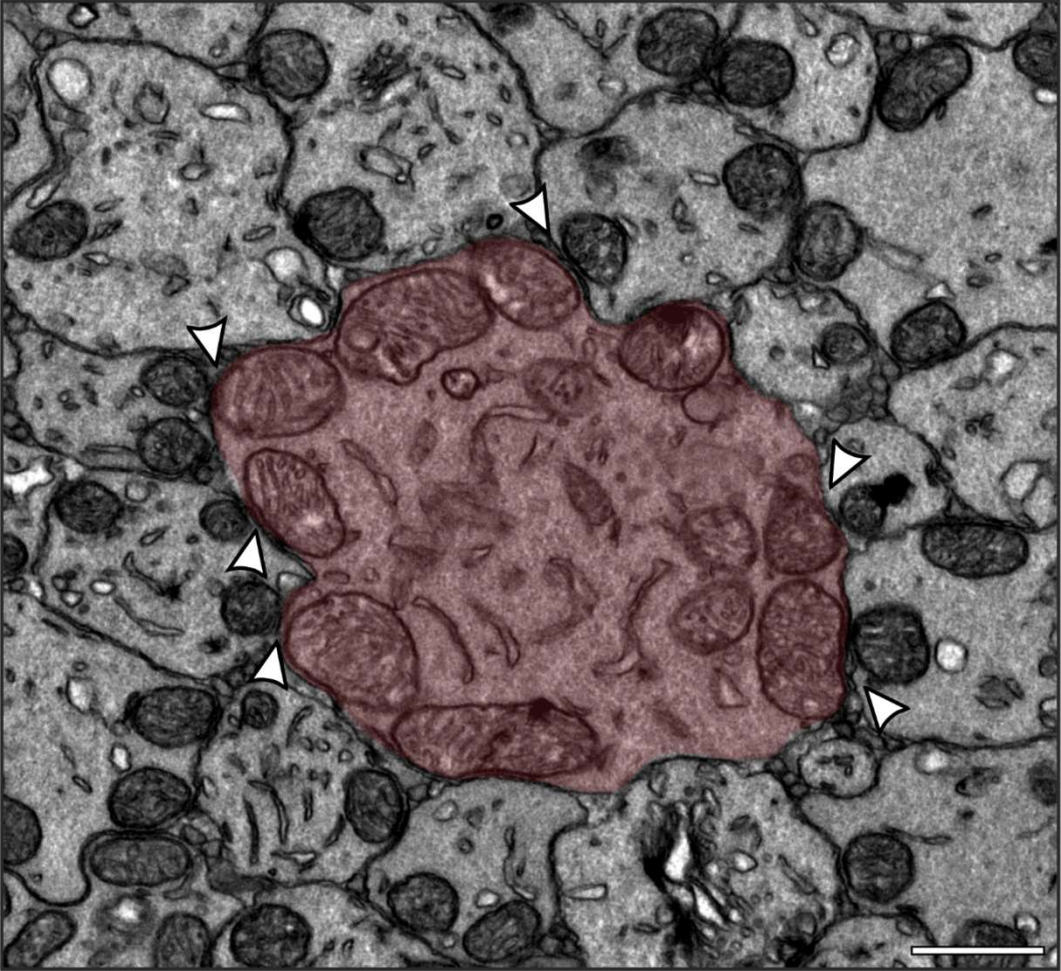

Supplement: Supplementary file [file media-2.pdf]
